# Supplementary material
Source: HighWire-hosted journal article supplement (https://ard.bmj.com/content/76/1/173)
Supplement: inline-supplementary-material-1 [file inline-supplementary-material-1.pdf]

## SUPPLEMENTARY APPENDIX

### **Canakinumab Treatment for Patients With Active Recurrent or Chronic TNF- Receptor Associated Periodic Syndrome (TRAPS): An Open-Label, Phase 2 Study**

Marco Gattorno,<sup>1</sup> Laura Obici,<sup>2</sup> Marco Cattalini,<sup>3</sup> Vincent Tormey,<sup>4</sup> Ken Abrams,<sup>5</sup>  
Nicole Davis,<sup>5</sup> Antonio Speziale,<sup>6</sup> Suraj Bhansali,<sup>5</sup> Alberto Martini,<sup>1,7</sup> and Helen  
Lachmann<sup>8</sup>

<sup>1</sup>UO Pediatria 2, G Gaslini Institute, Genova, Italy, <sup>2</sup>IRCCS Policlinico San Matteo,  
Pavia, Italy, <sup>3</sup>Pediatric Clinic, University of Brescia and Spedali Civili, Brescia, Italy,  
<sup>4</sup>Galway University Hospitals, Galway, Ireland, <sup>5</sup>Novartis Pharmaceutical  
Corporation, East Hanover, NJ, USA, <sup>6</sup>Novartis Pharma AG, Basel, Switzerland,  
<sup>7</sup>Department of Neurosciences, Rehabilitation, Ophthalmology, Genetics, and  
Maternal-Fetal Medicine (DINOEMI), University of Genoa, Genoa, Italy, <sup>8</sup>University  
College London Medical School, London, UK

## **METHODS**

### **Patients**

Male or female patients aged 4 years and older were eligible if they had a clinical diagnosis of active recurrent or chronic TRAPS with a confirmed mutation of the *TNFRSF1A* gene. For a diagnosis of recurrent TRAPS, patients must have experienced >6 episodes per year prior to receiving an effective biologic, with each episode lasting  $\geq 8$  days. Eligible patients exhibited clinical signs and symptoms of active TRAPS, as evidenced by a physician's global assessment (PGA) of TRAPS activity score  $\geq 2$  (described below) and an elevated C-reactive protein (CRP) >10 mg/L and/or serum amyloid A protein (SAA) >10 mg/L at time of first canakinumab treatment. Patients previously treated with anakinra must have demonstrated a partial or complete clinical response with an associated decrease in CRP and SAA. All patients, or for children, their parents/legal guardians, provided written informed consent.

Exclusion criteria were: history of immunocompromised status including a positive HIV test; positive tuberculosis screen; live vaccination within 3 months prior to the start of the trial, during the trial, and 3 months following the last dose; history of recurrent and/or active bacterial, fungal, or viral infection; or malignancy other than localized basal cell carcinoma of the skin within the past 5 years. Pregnant or nursing women were excluded; those of child-bearing potential used effective contraception during the study. The following medications were prohibited prior to

the baseline visit: corticosteroids  $>0.2$  mg/kg/day (or  $>15$  mg/day for children  $>60$  kg) within 1 week, anakinra within 24 hours, rilonacept within 1 week, tocilizumab within 3 weeks, etanercept within 4 weeks, rituximab within 26 weeks, conventional disease-modifying antirheumatic drugs within 4–12 weeks, any investigational biologic within 8 weeks, or any other investigational agent within 30 days or 5 half-lives whichever was longer. Prior treatment with canakinumab within 3 months of the baseline visit was not allowed. Patients with chronic TRAPS who required corticosteroid at the time of enrollment must have been on a stable dose of corticosteroid ( $\leq 0.2$  mg/kg/d prednisone or equivalent) for at least 1 week prior to baseline and were not to change the dose unless instructed by the investigator.

### **Pharmacokinetic Assessments**

Blood samples for assessment of canakinumab concentrations were taken by direct venipuncture (2 mL from adults and 1 mL from patients  $<16$  years of age) at Days 1, 3, 8, 15, 29, 57, 85, and 113. Canakinumab concentrations in serum were measured using a validated competitive enzymatic linked immunosorbent assay (ELISA) with a lower limit of quantification at 100 ng/mL.

### **Safety Assessments**

Adverse events and vital signs were monitored at all visits. Hematology, blood chemistry, and urinalysis were measured at all visits at which study treatment was administered. A physical examination was required at visits when acute TRAPS attacks were suspected. Blood samples for detection of anti-canakinumab

antibodies were collected on Days 1, 29, 113, and every 6 months during the long-term treatment period.

Supplementary Figure 1. Study design.

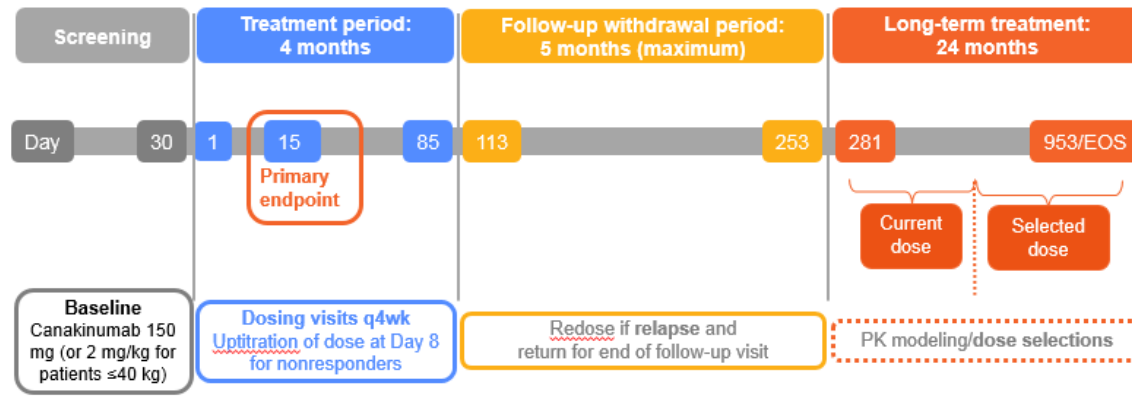

Supplementary Figure 2. Kaplan-Meier plot of time to investigator assessed clinical remission of TRAPS activity (PGA score  $\leq 1$ ).

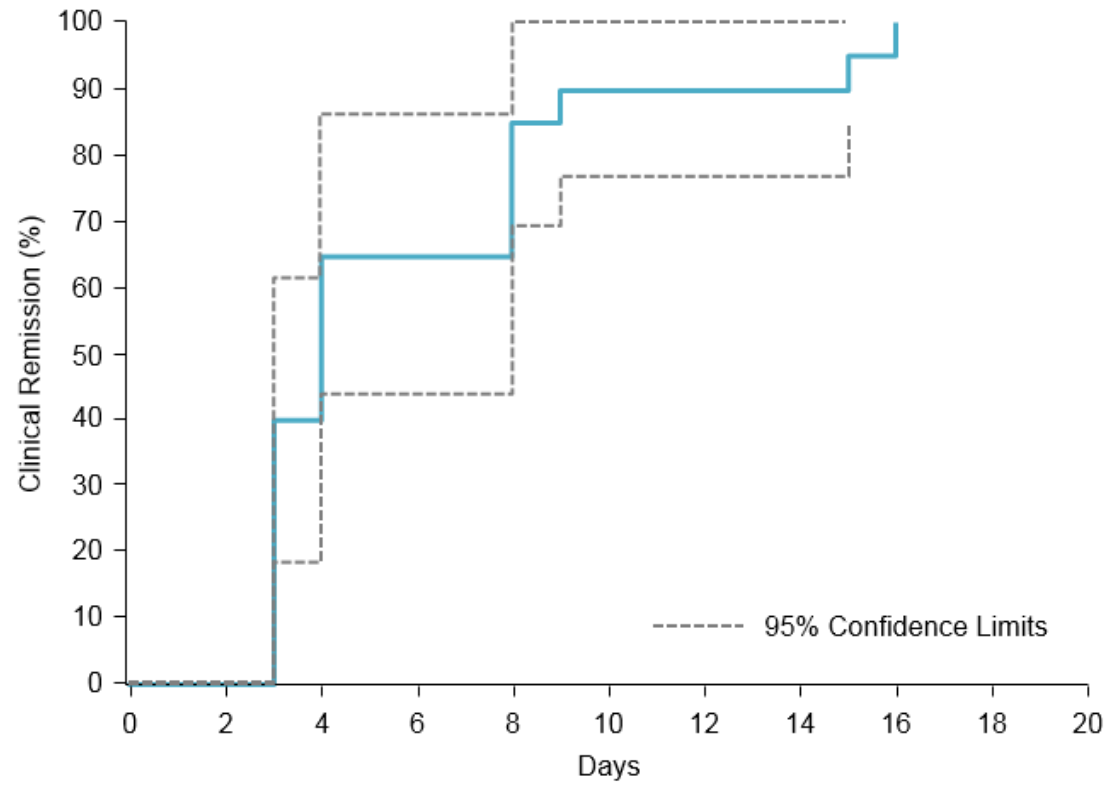

Supplementary Figure 3. Kaplan-Meier plot of time to relapse after last dose of canakinumab in 4-month treatment period. Relapse = PGA  $\geq 2$  AND represents an increase  $\geq 1$  point from Day 15 AND CRP and/or SAA  $\geq 30$  mg/L without other explanation for cause AND represents a 30% increase from Day 15.

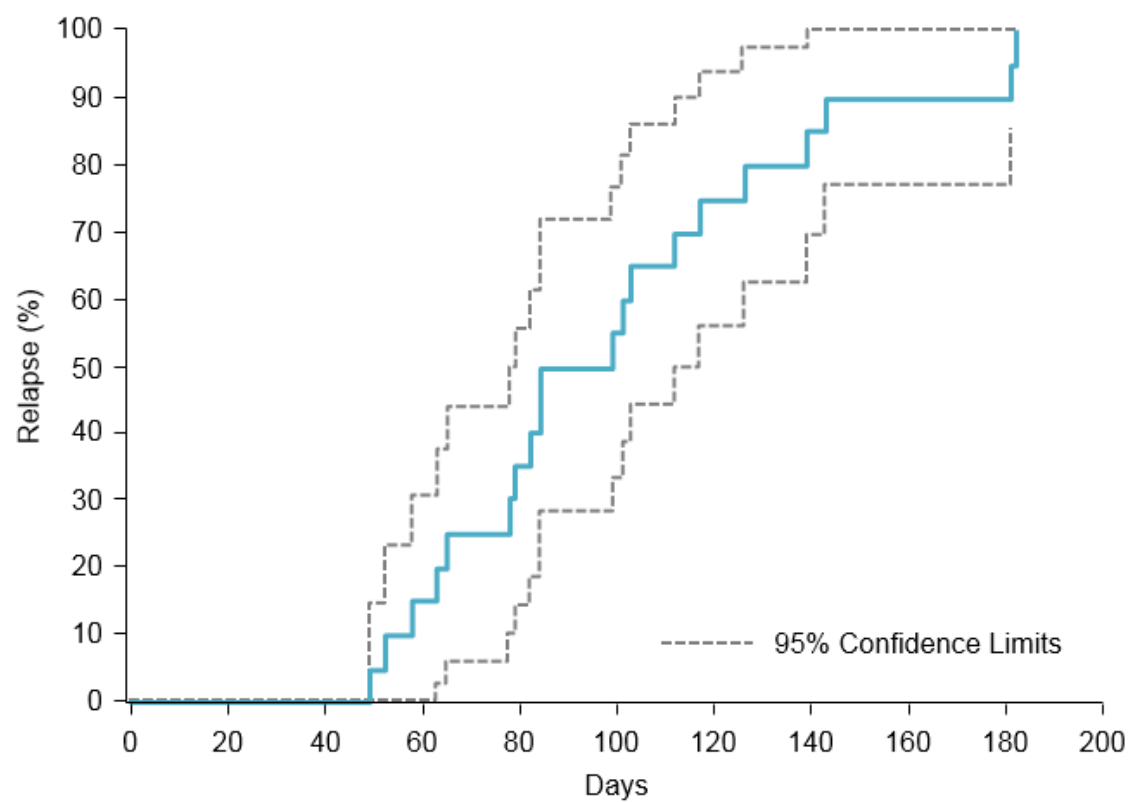

**Supplementary Table 1.** Investigator’s Assessment of the Severity of Key Signs and Symptoms of TRAPS

| Sign/Symptom                          | N  | Absent   | Minimal | Mild    | Moderate | Severe |
|---------------------------------------|----|----------|---------|---------|----------|--------|
| <b>Skin disease</b>                   |    |          |         |         |          |        |
| Baseline                              | 20 | 9 (45)   | 4 (20)  | 4 (20)  | 3 (15)   | 0      |
| Day 15                                | 20 | 19 (95)  | 1 (5)   | 0       | 0        | 0      |
| End of follow-up                      | 20 | 19 (95)  | 0       | 0       | 1 (5)    | 0      |
| End of study                          | 18 | 18 (100) | 0       | 0       | 0        | 0      |
| <b>Extremity musculoskeletal pain</b> |    |          |         |         |          |        |
| Baseline                              | 20 | 2 (10)   | 0       | 13 (65) | 4 (20)   | 1 (5)  |
| Day 15                                | 20 | 19 (95)  | 0       | 1 (5)   | 0        | 0      |
| End of follow-up                      | 20 | 17 (85)  | 2 (10)  | 1 (5)   | 0        | 0      |
| End of study                          | 18 | 17 (94)  | 0       | 1 (6)   | 0        | 0      |
| <b>Abdominal pain</b>                 |    |          |         |         |          |        |
| Baseline                              | 20 | 9 (45)   | 2 (10)  | 8 (40)  | 1 (5)    | 0      |
| Day 15                                | 20 | 18 (90)  | 2 (10)  | 0       | 0        | 0      |
| End of follow-up                      | 20 | 15 (75)  | 4 (20)  | 1 (5)   | 0        | 0      |
| End of study                          | 18 | 17 (94)  | 1 (6)   | 0       | 0        | 0      |
| <b>Eye manifestations</b>             |    |          |         |         |          |        |
| Baseline                              | 20 | 5 (25)   | 7 (35)  | 4 (20)  | 4 (20)   | 0      |
| Day 15                                | 20 | 19 (95)  | 0       | 1 (5)   | 0        | 0      |
| End of follow-up                      | 20 | 19 (95)  | 1 (5)   | 0       | 0        | 0      |
| End of study                          | 18 | 16 (89)  | 2 (11)  | 0       | 0        | 0      |



**Supplementary Table 2.** Changes in Median CRP and SAA Levels During Follow-up and Long-Term Treatment

|                                   | CRP |                          | SAA |                          |
|-----------------------------------|-----|--------------------------|-----|--------------------------|
|                                   | N   | Median (range),<br>mg/L* | N   | Median (range),<br>mg/L* |
| Withdrawal/follow-up (f/u) period |     |                          |     |                          |
| Day 113                           | 20  | 4.8 (0.6–186)            | 20  | 2.2 (0.8–259)            |
| Day 141                           | 19  | 8.6 (0.8–310)            | 19  | 4.6 (1.0–1030)           |
| Day 169                           | 13  | 10 (2.0–583)             | 13  | 5.2 (0.8–952)            |
| Day 197                           | 11  | 70 (2.0–498)             | 11  | 68.9 (1.3–1700)          |
| Day 225                           | 4   | 14 (2.0–131)             | 4   | 40 (4.0–699)             |
| End of f/u                        | 20  | 8.4 (0.6–186)            | 20  | 4.8 (0.8–609)            |
| Long-term treatment period        |     |                          |     |                          |
| Day 281                           | 20  | 6.8 (2.0–87)             | 20  | 5.2 (1.2–96)             |
| Day 309                           | 20  | 5.9 (2.0–246)            | 20  | 3.9 (0.8–795)            |
| Day 337                           | 20  | 5.8 (2.0–140)            | 20  | 3.5 (0.8–762)            |
| Day 365                           | 19  | 5.0 (2.0–23)             | 19  | 2.5 (0.8–25)             |
| Day 393                           | 17  | 5.8 (2.0–14)             | 17  | 3.4 (0.8–19)             |
| Day 421                           | 18  | 8.0 (2.0–105)            | 18  | 4.4 (0.8–302)            |
| Day 449                           | 18  | 4.5 (1.8–16)             | 17  | 2.5 (0.8–20)             |
| Day 477                           | 19  | 5.8 (1.2–56)             | 19  | 4.0 (0.8–120)            |
| Day 505                           | 18  | 5.9 (1.8–31)             | 18  | 4.9 (0.8–73)             |
| Day 533                           | 19  | 3.8 (1.2–14)             | 19  | 3.4 (0.8–12.2)           |
| Day 561                           | 19  | 3.8 (1.1–18)             | 19  | 3.6 (1.0–32)             |
| Day 589                           | 12  | 3.8 (1.6–10)             | 12  | 2.2 (1.1–7.5)            |
| Day 617                           | 17  | 3.8 (0.9–38)             | 17  | 3.6 (0.8–17)             |
| Day 673                           | 18  | 5.9 (1.2–410)            | 18  | 3.5 (0.9–1510)           |
| Day 729                           | 18  | 8.4 (1.2–264)            | 18  | 4.8 (0.8–807)            |
| Day 785                           | 17  | 8.0 (1.2–290)            | 18  | 4.0 (0.8–864)            |
| Day 841                           | 18  | 9.2 (2.0–214)            | 18  | 4.8 (0.8–556)            |
| Day 897                           | 18  | 7.0 (1.8–388)            | 18  | 6.1 (0.8–895)            |
| End of study                      | 16  | 4.0 (1.8–112)            | 18  | 4.9 (1.2–221)            |

\*Normal CRP and SAA level defined as  $\leq 0-10$  mg/L.

**Supplementary Table 3.** Trough (pre-dose) concentrations at week 16 (day 113, 4 weeks post last dose) from the 17 patients receiving 150-mg dose q4wk

|             | <b>Canakinumab Concentration (<math>\mu\text{g/mL}</math>)</b> |
|-------------|----------------------------------------------------------------|
| <b>Mean</b> | 14.7                                                           |
| <b>SD</b>   | 5.23                                                           |
| <b>CV%</b>  | 35.3                                                           |

CV, coefficient of variation; SD, standard deviation.

**Supplementary Table 4. Description of Serious Adverse Events (SAE)**

| Patient (age, gender) | SAE (Day of diagnosis)                    | Relevant history                                             | Description of SAE                                                                                                                                                       | Drug related | Canakinumab continued | Treatment of SAE (outcome)                                                   |
|-----------------------|-------------------------------------------|--------------------------------------------------------------|--------------------------------------------------------------------------------------------------------------------------------------------------------------------------|--------------|-----------------------|------------------------------------------------------------------------------|
| 17F                   | Upper respiratory tract infection (Day 3) | Fever presented 5 days before first dose of study drug       | Culture positive for <i>S. pneumoniae</i> and <i>H. influenzae</i> on Day 1                                                                                              | No           | Yes                   | Augmentin, ceftriaxone (resolved on Day 11)                                  |
| 41M                   | Pericarditis (Day 245)                    | Chest pain, gout                                             | Fever, left-sided chest pain, and joint pain on Day 242; EEG showed normal sinus rhythm with ST elevation, and echocardiography showed small global pericardial effusion | No           | Yes                   | Ibuprofen (resolved by Day 267)                                              |
|                       | Pregnancy-related condition               |                                                              | Wife became pregnant after patient had received study drug for approximately 1 year                                                                                      | No           | Yes                   | Delivered normal female neonate by caesarean section at week 40 of pregnancy |
| 77F                   | Foot deformity (approx. Day 725)          | Cutaneous vasculitis, retroperitoneal fibrosis, and fibrosis | Osteoporosis diagnosed on Day 147 and treated with alendronic acid, calcium, and vitamin D; developed hammer toes on right foot                                          | No           | Yes                   | Underwent repair of contracted toes; osteoporosis ongoing at day 996         |
| 49M                   | Hypertriglyceridemia (Day 351)            | Fungal skin infection                                        | Triglyceride levels increased from 1.16                                                                                                                                  | No           | Yes                   | Omega-3 acid ethyl ester; serum                                              |

|     |                                                                                                |                                                                                                                  |                                                                                                         |    |     |                                                                                                                                                         |
|-----|------------------------------------------------------------------------------------------------|------------------------------------------------------------------------------------------------------------------|---------------------------------------------------------------------------------------------------------|----|-----|---------------------------------------------------------------------------------------------------------------------------------------------------------|
|     |                                                                                                |                                                                                                                  | mmol/L at baseline to 17.6 mmol/L on Day 351                                                            |    |     | triglycerides declined to 4.14 mmol/L by Day 437; event considered ongoing at last visit                                                                |
| 54M | Abdominal pain (Day 665)                                                                       | Duodenal ulcer, hypertension, amyloidosis, anxiety, chronic renal failure, chronic obstructive pulmonary disease | CT scan showed bowel dilation and air fluid levels suggesting subocclusion resulting in hospitalization | No | Yes | Fluid replacement, prednisone, and analgesics; resolved on Day 669                                                                                      |
|     | Hyperkalemia (Day 1069)                                                                        |                                                                                                                  | Moderate hyperkalemia with metabolic acidosis resulting in hospitalization                              | No | Yes | Hemodialysis, allopurinol, and omega-3 triglycerides; resolved on Day 1070                                                                              |
| 37M | Abdominal pain with intestinal obstruction (Days 489 and 694); vomiting and diarrhea (Day 694) | Arthralgia, asthma, osteoporosis, headache                                                                       | Abdominal X-ray showed air fluid levels with severe intestinal obstruction resulting in hospitalization | No | Yes | Fluid replacement for episode 1; paracetamol, hyoscine butylbromide, and prednisone also used for episode 2; resolved on Days 492 and 698, respectively |
|     | Meniscus injury (Day 770)                                                                      |                                                                                                                  | Knee trauma while playing football; MRI showed lesion at meniscus                                       | No | Yes | Surgery; resolved on Day 800                                                                                                                            |

|     |                       |      |                                                    |    |     |                                                                                                                          |
|-----|-----------------------|------|----------------------------------------------------|----|-----|--------------------------------------------------------------------------------------------------------------------------|
| 39M | TRAPS flare (Day 158) | None | Severe TRAPS symptoms resulting in hospitalization | No | Yes | Electrolyte replacement, omeprazole, paracetamol, sodium chloride, methylprednisolone, and tramadol; resolved on Day 161 |
|-----|-----------------------|------|----------------------------------------------------|----|-----|--------------------------------------------------------------------------------------------------------------------------|
